# Supplementary material
Source: MDPI journal article supplement (https://www.mdpi.com/2073-4433/15/5/590)
Supplement: s1 [file s1]

**Table S1.** Examination of relationships between daily air pollutant levels and weather factors using Spearman analysis

| <b>Winter</b>     | NO <sub>2</sub> | PM <sub>10</sub> | O <sub>3</sub> | Temperature | Relative humidity |
|-------------------|-----------------|------------------|----------------|-------------|-------------------|
| NO <sub>2</sub>   | 1               | 0.40**           | -0.39**        | -0.16**     | 0.02              |
| PM <sub>10</sub>  | 0.40**          | 1                | -0.31**        | -0.15**     | 0.16**            |
| O <sub>3</sub>    | -0.39**         | -0.31**          | 1              | 0.11*       | -0.36**           |
| Air temperature   | -0.16**         | -0.15**          | 0.11*          | 1           | -0.38**           |
| Relative humidity | 0.02            | 0.16**           | -0.36**        | -0.38**     | 1                 |
| <b>Spring</b>     |                 |                  |                |             |                   |
| NO <sub>2</sub>   | 1               | 0.23**           | -0.37**        | -0.17**     | -0.03             |
| PM <sub>10</sub>  | 0.23**          | 1                | 0.14**         | -0.07       | -0.32**           |
| O <sub>3</sub>    | -0.37**         | 0.14**           | 1              | 0.08        | -0.58**           |
| Air temperature   | -0.17**         | -0.07            | 0.08           | 1           | -0.06             |
| Relative humidity | -0.03           | -0.32**          | -0.58**        | -0.06       | 1                 |
| <b>Summer</b>     |                 |                  |                |             |                   |
| NO <sub>2</sub>   | 1               | 0.16**           | -0.07          | 0.11*       | -0.14**           |
| PM <sub>10</sub>  | 0.16**          | 1                | 0.15**         | 0.46**      | -0.35**           |
| O <sub>3</sub>    | -0.07           | 0.15**           | 1              | 0.43**      | -0.61**           |
| Air temperature   | 0.11*           | 0.46**           | 0.43**         | 1           | -0.66**           |
| Relative humidity | -0.14**         | -0.35**          | -0.61**        | -0.66**     | 1                 |
| <b>Fall</b>       |                 |                  |                |             |                   |

|                   |         |         |         |         |         |
|-------------------|---------|---------|---------|---------|---------|
| NO <sub>2</sub>   | 1       | 0.44**  | -0.39** | -0.15** | 0.07    |
| PM <sub>10</sub>  | 0.44**  | 1       | -0.13** | -0.06   | -0.01   |
| O <sub>3</sub>    | -0.39** | -0.13** | 1       | 0.64**  | -0.72** |
| Air temperature   | -0.15** | -0.06   | 0.64**  | 1       | -0.66** |
| Relative humidity | 0.07    | -0.01   | -0.72** | -0.66** | 1       |

\*\* P < 0.01; \* P < 0.05; PM<sub>10</sub>: particulate matter diameter ≤10 µm; NO<sub>2</sub>: nitrogen dioxide; O<sub>3</sub>: ozone.

**Table S2.** Multivariable Poisson Regression Analysis of Brief Increments in Air Pollutant Levels ( $\geq 10 \mu\text{g}/\text{m}^3$ ) and the Risk of STEMI Admission at Single Lag Day

|                                | <b>NO<sub>2</sub> (<math>\mu\text{g}/\text{m}^3</math>)</b> |              | <b>PM<sub>10</sub> (<math>\mu\text{g}/\text{m}^3</math>)</b> |         | <b>O<sub>3</sub> (<math>\mu\text{g}/\text{m}^3</math>)</b> |         |
|--------------------------------|-------------------------------------------------------------|--------------|--------------------------------------------------------------|---------|------------------------------------------------------------|---------|
| Single lag day                 | Odds Ratio (95% CI)                                         | p-Value      | Odds Ratio (95% CI)                                          | p-Value | Odds Ratio (95% CI)                                        | p-Value |
| <b>All patients with STEMI</b> |                                                             |              |                                                              |         |                                                            |         |
| <b>Winter</b>                  |                                                             |              |                                                              |         |                                                            |         |
| 0                              | 1.001 (0.997-1.006)                                         | 0.588        | 0.997 (0.993-1.002)                                          | 0.227   | 0.997 (0.993-1.001)                                        | 0.173   |
| 1                              | 1.003 (0.999-1.008)                                         | 0.155        | 0.999 (0.995-1.004)                                          | 0.774   | 0.999 (0.995-1.003)                                        | 0.717   |
| 2                              | 1.003 (0.998-1.007)                                         | 0.247        | 0.999 (0.994-1.003)                                          | 0.530   | 0.999 (0.995-1.003)                                        | 0.710   |
| 3                              | 1.002 (0.998-1.007)                                         | 0.360        | 0.996 (0.991-1.000)                                          | 0.058   | 1.000 (0.996-1.005)                                        | 0.820   |
| 4                              | 1.000 (0.995-1.005)                                         | 0.996        | 0.997 (0.993-1.002)                                          | 0.257   | 1.000 (0.996-1.004)                                        | 0.966   |
| 5                              | 1.002 (0.998-1.006)                                         | 0.351        | 0.998 (0.994-1.003)                                          | 0.442   | 1.000 (0.996-1.004)                                        | 0.926   |
| 6                              | 1.004 (0.999-1.008)                                         | 0.116        | 0.997 (0.993-1.002)                                          | 0.218   | 0.999 (0.995-1.003)                                        | 0.617   |
| 7                              | 1.002 (0.998-1.007)                                         | 0.288        | 1.000 (0.996-1.005)                                          | 0.934   | 0.999 (0.995-1.003)                                        | 0.773   |
| <b>Spring</b>                  |                                                             |              |                                                              |         |                                                            |         |
| 0                              | 1.006 (1.000-1.012)                                         | 0.058        | 0.997 (0.991-1.003)                                          | 0.320   | 0.997 (0.993-1.002)                                        | 0.220   |
| 1                              | 1.005 (0.999-1.011)                                         | 0.090        | 0.998 (0.992-1.004)                                          | 0.487   | 0.997 (0.992-1.001)                                        | 0.153   |
| 2                              | 1.007 (1.001-1.013)                                         | <b>0.018</b> | 0.996 (0.990-1.003)                                          | 0.289   | 0.999 (0.994-1.004)                                        | 0.643   |
| 3                              | 1.008 (1.002-1.014)                                         | <b>0.007</b> | 0.997 (0.991-1.004)                                          | 0.418   | 0.999 (0.994-1.003)                                        | 0.610   |
| 4                              | 1.005 (0.999-1.011)                                         | 0.124        | 0.999 (0.993-1.005)                                          | 0.757   | 0.997 (0.993-1.002)                                        | 0.227   |
| 5                              | 1.004 (0.998-1.010)                                         | 0.216        | 0.996 (0.990-1.002)                                          | 0.189   | 0.996 (0.992-1.000)                                        | 0.071   |
| 6                              | 1.007 (1.001-1.014)                                         | <b>0.022</b> | 0.996 (0.990-1.002)                                          | 0.229   | 1.000 (0.995-1.004)                                        | 0.884   |

|               |                     |              |                     |                  |                     |       |
|---------------|---------------------|--------------|---------------------|------------------|---------------------|-------|
| 7             | 1.008 (1.002-1.014) | <b>0.014</b> | 0.993 (0.987-1.000) | 0.058            | 1.000 (0.996-1.004) | 0.964 |
| <b>Summer</b> |                     |              |                     |                  |                     |       |
| 0             | 1.005 (0.999-1.011) | 0.106        | 1.012 (1.005-1.019) | <b>0.001</b>     | 0.999 (0.994-1.004) | 0.711 |
| 1             | 1.002 (0.996-1.008) | 0.600        | 1.009 (1.001-1.016) | <b>0.019</b>     | 0.999 (0.994-1.004) | 0.732 |
| 2             | 1.002 (0.996-1.009) | 0.437        | 1.014 (1.006-1.022) | <b>&lt;0.001</b> | 1.000 (0.995-1.005) | 0.872 |
| 3             | 1.005 (0.999-1.011) | 0.093        | 1.011 (1.004-1.019) | <b>0.003</b>     | 1.001 (0.996-1.006) | 0.594 |
| 4             | 1.005 (0.999-1.011) | 0.095        | 1.005 (0.997-1.012) | <b>0.026</b>     | 1.003 (0.997-1.008) | 0.329 |
| 5             | 1.005 (0.999-1.011) | 0.075        | 1.008 (1.000-1.017) | <b>0.046</b>     | 1.001 (0.996-1.006) | 0.653 |
| 6             | 1.006 (1.000-1.012) | 0.052        | 1.010 (1.002-1.018) | <b>0.010</b>     | 0.998 (0.993-1.003) | 0.434 |
| 7             | 1.006 (1.000-1.012) | 0.038        | 1.017 (1.009-1.024) | <b>&lt;0.001</b> | 0.999 (0.995-1.004) | 0.740 |
| <b>Fall</b>   |                     |              |                     |                  |                     |       |
| 0             | 1.001 (0.995-1.007) | 0.762        | 1.005 (1.000-1.009) | <b>0.038</b>     | 1.000 (0.994-1.005) | 0.871 |
| 1             | 1.001 (0.995-1.007) | 0.780        | 1.006 (1.002-1.010) | <b>0.003</b>     | 1.001 (0.996-1.007) | 0.647 |
| 2             | 1.001 (0.996-1.007) | 0.623        | 1.004 (1.000-1.008) | <b>0.033</b>     | 0.997 (0.991-1.002) | 0.232 |
| 3             | 1.001 (0.995-1.007) | 0.711        | 1.003 (0.999-1.007) | 0.129            | 0.998 (0.993-1.004) | 0.535 |
| 4             | 1.000 (0.995-1.006) | 0.895        | 1.001 (0.997-1.006) | 0.476            | 0.998 (0.992-1.004) | 0.463 |
| 5             | 1.002 (0.996-1.008) | 0.566        | 1.001 (0.997-1.006) | 0.563            | 0.998 (0.992-1.003) | 0.452 |
| 6             | 1.005 (0.999-1.010) | 0.104        | 0.999 (0.995-1.004) | 0.800            | 0.999 (0.993-1.004) | 0.668 |
| 7             | 1.003 (0.997-1.008) | 0.345        | 1.002 (0.998-1.006) | 0.351            | 0.998 (0.992-1.003) | 0.426 |

An OR > 1 indicates an elevated risk, while a value < 1 suggests a decreased risk. A p-value less than 0.05 indicates a statistically significant relationship. STEMI: ST-elevation myocardial infarction; PM<sub>10</sub>: particulate matter with a diameter ≤10 µm; NO<sub>2</sub>: nitrogen dioxide; OR: odds ratio; CI: confidence interval.

**Table S3.** Multivariable Poisson Regression Analysis of Brief Increments in Air Pollutant Levels ( $\geq 10 \mu\text{g}/\text{m}^3$ ) and the Risk of STEMI Admission at Cumulative Lag Day

|                                | <b>NO<sub>2</sub> (<math>\mu\text{g}/\text{m}^3</math>)</b> |              | <b>PM<sub>10</sub> (<math>\mu\text{g}/\text{m}^3</math>)</b> |                  | <b>O<sub>3</sub> (<math>\mu\text{g}/\text{m}^3</math>)</b> |         |
|--------------------------------|-------------------------------------------------------------|--------------|--------------------------------------------------------------|------------------|------------------------------------------------------------|---------|
| <b>Cumulative Lag day</b>      | Odds Ratio (95% CI)                                         | p-Value      | Odds Ratio (95% CI)                                          | p-Value          | Odds Ratio (95% CI)                                        | p-Value |
| <b>All patients with STEMI</b> |                                                             |              |                                                              |                  |                                                            |         |
| <b>Winter</b>                  |                                                             |              |                                                              |                  |                                                            |         |
| 03                             | 1.003 (0.998-1.008)                                         | 0.207        | 0.997 (0.992-1.002)                                          | 0.261            | 0.999 (0.994-1.004)                                        | 0.707   |
| 05                             | 1.003 (0.998-1.008)                                         | 0.292        | 0.997 (0.991-1.002)                                          | 0.249            | 0.999 (0.995-1.004)                                        | 0.767   |
| 07                             | 1.003 (0.998-1.009)                                         | 0.209        | 0.997 (0.991-1.003)                                          | 0.269            | 0.999 (0.994-1.004)                                        | 0.704   |
| <b>Spring</b>                  |                                                             |              |                                                              |                  |                                                            |         |
| 03                             | 1.008 (1.001-1.015)                                         | <b>0.018</b> | 0.997 (0.989-1.006)                                          | 0.499            | 0.997 (0.992-1.002)                                        | 0.273   |
| 05                             | 1.008 (1.001-1.015)                                         | <b>0.031</b> | 0.997 (0.988-1.006)                                          | 0.481            | 0.997 (0.991-1.002)                                        | 0.213   |
| 07                             | 1.009 (1.001-1.016)                                         | <b>0.019</b> | 0.995 (0.986-1.005)                                          | 0.339            | 0.997 (0.992-1.003)                                        | 0.340   |
| <b>Summer</b>                  |                                                             |              |                                                              |                  |                                                            |         |
| 03                             | 1.005 (0.998-1.012)                                         | 0.142        | 1.016 (1.007-1.025)                                          | <b>&lt;0.001</b> | 1.001 (0.995-1.007)                                        | 0.827   |
| 05                             | 1.006 (0.999-1.013)                                         | 0.087        | 1.017 (1.007-1.027)                                          | <b>0.001</b>     | 0.999 (0.993-1.006)                                        | 0.821   |
| 07                             | 1.007 (1.000-1.014)                                         | 0.052        | 1.020 (1.010-1.031)                                          | <b>&lt;0.001</b> | 0.998 (0.992-1.005)                                        | 0.612   |
| <b>Fall</b>                    |                                                             |              |                                                              |                  |                                                            |         |
| 03                             | 1.000 (0.994-1.007)                                         | 0.894        | 1.006 (1.001-1.011)                                          | <b>0.011</b>     | 0.997 (0.991-1.004)                                        | 0.439   |
| 05                             | 1.001 (0.994-1.007)                                         | 0.865        | 1.005 (1.000-1.010)                                          | <b>0.046</b>     | 0.998 (0.991-1.004)                                        | 0.475   |
| 07                             | 1.001 (0.995-1.008)                                         | 0.688        | 1.005 (0.999-1.010)                                          | 0.088            | 0.997 (0.991-1.004)                                        | 0.431   |

An OR > 1 indicates an elevated risk, while a value < 1 suggests a decreased risk. A p-value less than 0.05 indicates a statistically significant relationship. STEMI: ST-elevation myocardial infarction; PM<sub>10</sub>: particulate matter with a diameter  $\leq 10 \mu\text{m}$ ; NO<sub>2</sub>: nitrogen dioxide; OR: odds ratio; CI: confidence interval.
